# Supplementary material for: Verbal fluency tests assess global cognitive status but have limited diagnostic differentiation: evidence from a large-scale examination of six neurodegenerative diseases
Source: PubMed Central journal article supplement (PMC9999359; doi:10.1093/braincomms/fcad042), 2023-02-21
Supplement: fcad042_supplementary_data.pdf [file fcad042_supplementary_data.pdf]

## Supplementary material

**Supplementary Table 1** Production Order (PO) and all word features

|         | <b>PO-Len</b>                 | <b>PO-Imag</b>                 | <b>PO-Freq</b>                 | <b>PO-OLD</b>                 | <b>PO-PLD</b>                 | <b>PO-Conc</b>                 | <b>PO-AoA</b>                 | <b>PO-SD</b>                  | <b>PO-Fam</b>                  | <b>PO-SND</b>                  | <b>Type</b> |
|---------|-------------------------------|--------------------------------|--------------------------------|-------------------------------|-------------------------------|--------------------------------|-------------------------------|-------------------------------|--------------------------------|--------------------------------|-------------|
| Control | r = 0.07,<br><i>p</i> = 0.11  | r = -0.15,<br><i>p</i> = 0.009 | r = -0.15,<br><i>p</i> < 0.001 | r = 0.006,<br><i>p</i> = 0.88 | r = 0.02,<br><i>p</i> = 0.58  | r = -0.18,<br><i>p</i> = 0.001 | r = 0.19,<br><i>p</i> < 0.001 | r = -0.07,<br><i>p</i> = 0.13 | r = -0.11,<br><i>p</i> = 0.05  | r = -0.12,<br><i>p</i> = 0.005 | Letter      |
|         | r = 0.14,<br><i>p</i> < 0.001 | r = -0.18,<br><i>p</i> < 0.001 | r = -0.23,<br><i>p</i> < 0.001 | r = 0.12,<br><i>p</i> = 0.003 | r = 0.10,<br><i>p</i> = 0.01  | r = -0.12,<br><i>p</i> = 0.003 | r = 0.20,<br><i>p</i> < 0.001 | r = -0.03,<br><i>p</i> = 0.45 | r = -0.17,<br><i>p</i> < 0.001 | r = -0.20,<br><i>p</i> < 0.001 | Category    |
| AD      | r = 0.17,<br><i>p</i> = 0.05  | r = -0.16,<br><i>p</i> = 0.11  | r = -0.26,<br><i>p</i> = 0.002 | r = 0.19,<br><i>p</i> = 0.03  | r = 0.18,<br><i>p</i> = 0.04  | r = -0.22,<br><i>p</i> = 0.02  | r = 0.32,<br><i>p</i> = 0.001 | r = -0.01,<br><i>p</i> = 0.88 | r = -0.26,<br><i>p</i> = 0.008 | r = -0.14,<br><i>p</i> = 0.11  | Letter      |
|         | r = 0.22,<br><i>p</i> = 0.004 | r = -0.29,<br><i>p</i> = 0.002 | r = -0.38,<br><i>p</i> < 0.001 | r = 0.19,<br><i>p</i> = 0.01  | r = 0.16,<br><i>p</i> = 0.04  | r = -0.12,<br><i>p</i> = 0.15  | r = 0.36,<br><i>p</i> < 0.001 | r = 0.04,<br><i>p</i> = 0.64  | r = -0.34,<br><i>p</i> < 0.001 | r = -0.32,<br><i>p</i> < 0.001 | Category    |
| bvFTD   | r = 0.13,<br><i>p</i> = 0.20  | r = -0.39,<br><i>p</i> < 0.001 | r = 0.03,<br><i>p</i> = 0.78   | r = 0.14,<br><i>p</i> = 0.17  | r = 0.17,<br><i>p</i> = 0.08  | r = -0.39,<br><i>p</i> < 0.001 | r = 0.28,<br><i>p</i> = 0.02  | r = 0.13,<br><i>p</i> = 0.18  | r = -0.27,<br><i>p</i> = 0.03  | r = 0.08,<br><i>p</i> = 0.39   | Letter      |
|         | r = 0.28,<br><i>p</i> = 0.001 | r = -0.16,<br><i>p</i> = 0.06  | r = -0.34,<br><i>p</i> < 0.001 | r = 0.25,<br><i>p</i> = 0.003 | r = 0.21,<br><i>p</i> = 0.01  | r = -0.09,<br><i>p</i> = 0.29  | r = 0.26,<br><i>p</i> = 0.002 | r = -0.02,<br><i>p</i> = 0.82 | r = -0.34,<br><i>p</i> < 0.001 | r = -0.39,<br><i>p</i> < 0.001 | Category    |
| svPPA   | r = 0.10,<br><i>p</i> = 0.18  | r = -0.18,<br><i>p</i> = 0.04  | r = -0.23,<br><i>p</i> = 0.001 | r = 0.06,<br><i>p</i> = 0.41  | r = 0.09,<br><i>p</i> = 0.19  | r = -0.21,<br><i>p</i> = 0.02  | r = 0.28,<br><i>p</i> < 0.001 | r = -0.07,<br><i>p</i> = 0.31 | r = -0.31,<br><i>p</i> < 0.001 | r = -0.18,<br><i>p</i> = 0.01  | Letter      |
|         | r = 0.36,<br><i>p</i> < 0.001 | r = -0.31,<br><i>p</i> < 0.001 | r = -0.44,<br><i>p</i> < 0.001 | r = 0.28,<br><i>p</i> < 0.001 | r = 0.18,<br><i>p</i> = 0.02  | r = -0.02,<br><i>p</i> = 0.83  | r = 0.49,<br><i>p</i> < 0.001 | r = 0.07,<br><i>p</i> = 0.38  | r = -0.43,<br><i>p</i> < 0.001 | r = -0.35,<br><i>p</i> < 0.001 | Category    |
| nfvPPA  | r = 0.09,<br><i>p</i> = 0.25  | r = -0.15,<br><i>p</i> = 0.13  | r = -0.15,<br><i>p</i> = 0.05  | r = 0.08,<br><i>p</i> = 0.31  | r = 0.07,<br><i>p</i> = 0.41  | r = -0.17,<br><i>p</i> = 0.10  | r = 0.14,<br><i>p</i> = 0.17  | r = -0.10,<br><i>p</i> = 0.24 | r = -0.08,<br><i>p</i> = 0.43  | r = -0.09,<br><i>p</i> = 0.24  | Letter      |
|         | r = 0.29,<br><i>p</i> < 0.001 | r = -0.31,<br><i>p</i> < 0.001 | r = -0.42,<br><i>p</i> < 0.001 | r = 0.29,<br><i>p</i> < 0.001 | r = 0.23,<br><i>p</i> < 0.001 | r = -0.10,<br><i>p</i> = 0.14  | r = 0.42,<br><i>p</i> < 0.001 | r = -0.05,<br><i>p</i> = 0.48 | r = -0.38,<br><i>p</i> < 0.001 | r = -0.35,<br><i>p</i> < 0.001 | Category    |

|     |                                      |                                      |                                       |                                      |                                      |                                      |                                      |                                      |                                       |                                       |          |
|-----|--------------------------------------|--------------------------------------|---------------------------------------|--------------------------------------|--------------------------------------|--------------------------------------|--------------------------------------|--------------------------------------|---------------------------------------|---------------------------------------|----------|
| CBS | r = -<br>0.07,<br><i>p</i> =<br>0.55 | r = -<br>0.09,<br><i>p</i> =<br>0.47 | r =<br>0.03,<br><i>p</i> =<br>0.78    | r = -<br>0.11,<br><i>p</i> =<br>0.29 | r = -<br>0.05,<br><i>p</i> =<br>0.66 | r = -<br>0.14,<br><i>p</i> =<br>0.29 | r = -<br>0.06,<br><i>p</i> =<br>0.65 | r = -<br>0.02,<br><i>p</i> =<br>0.82 | r = -<br>0.16,<br><i>p</i> =<br>0.22  | r = -<br>0.03,<br><i>p</i> =<br>0.75  | Letter   |
|     | r =<br>0.46,<br><i>p</i> <<br>0.001  | r = -<br>0.21,<br><i>p</i> =<br>0.01 | r = -<br>0.39,<br><i>p</i> <<br>0.001 | r =<br>0.44,<br><i>p</i> <<br>0.001  | r =<br>0.35,<br><i>p</i> <<br>0.001  | r = -<br>0.12,<br><i>p</i> =<br>0.15 | r =<br>0.38,<br><i>p</i> <<br>0.001  | r =<br>0.12,<br><i>p</i> =<br>0.16   | r = -<br>0.34,<br><i>p</i> <<br>0.001 | r = -<br>0.39,<br><i>p</i> <<br>0.001 | Category |
| PSP | r =<br>0.03,<br><i>p</i> =<br>0.73   | r = -<br>0.05,<br><i>p</i> =<br>0.57 | r = -<br>0.10,<br><i>p</i> =<br>0.16  | r =<br>0.05,<br><i>p</i> =<br>0.50   | r =<br>0.08,<br><i>p</i> =<br>0.29   | r = -<br>0.12,<br><i>p</i> =<br>0.19 | r =<br>0.10,<br><i>p</i> =<br>0.25   | r = -<br>0.12,<br><i>p</i> =<br>0.11 | r = -<br>0.13,<br><i>p</i> =<br>0.16  | r = -<br>0.14,<br><i>p</i> =<br>0.06  | Letter   |
|     | r =<br>0.16,<br><i>p</i> =<br>0.007  | r = -<br>0.12,<br><i>p</i> =<br>0.04 | r = -<br>0.26,<br><i>p</i> <<br>0.001 | r =<br>0.12,<br><i>p</i> =<br>0.04   | r =<br>0.06,<br><i>p</i> =<br>0.29   | r = -<br>0.05,<br><i>p</i> =<br>0.36 | r =<br>0.25,<br><i>p</i> <<br>0.001  | r = -<br>0.04,<br><i>p</i> =<br>0.52 | r = -<br>0.22,<br><i>p</i> <<br>0.001 | r = -<br>0.21,<br><i>p</i> <<br>0.001 | Category |

AD, Alzheimer's disease; AoA, age of acquisition; bvFTD, behavioural variant frontotemporal dementia; CBS, corticobasal syndrome; Conc, concreteness; Fam, familiarity; Freq, frequency; Imag, imageability; Len, length; nfvPPA, non-fluent variant primary progressive aphasia; OLD, orthographic levenshtein distance; PLD, phonological levenshtein distance; PSP, progressive supranuclear palsy; SD, semantic diversity; SND, semantic neighbourhood density; svPPA, semantic variant primary progressive aphasia.
